# Supplementary material
Source: ML conference proceedings conference paper supplement (https://proceedings.neurips.cc/paper_files/paper/2020/hash/3948ead63a9f2944218de038d8934305-Abstract.html)
Supplement: Supplementary file [file 3948ead63a9f2944218de038d8934305-Supplemental.zip]

|       |       |       |       |       |       |       |       |       |       |       |       |       |       |       |
|-------|-------|-------|-------|-------|-------|-------|-------|-------|-------|-------|-------|-------|-------|-------|
| 0.025 | 0.001 | 0.003 | 0.003 | 0.000 | 0.001 | 0.000 | 0.001 | 0.001 | 0.000 | 0.002 | 0.000 | 0.001 | 0.000 | 0.000 |
| 0.001 | 0.030 | 0.005 | 0.006 | 0.005 | 0.004 | 0.000 | 0.002 | 0.001 | 0.000 | 0.001 | 0.002 | 0.002 | 0.001 | 0.001 |
| 0.003 | 0.005 | 0.018 | 0.000 | 0.004 | 0.002 | 0.001 | 0.000 | 0.002 | 0.001 | 0.001 | 0.001 | 0.002 | 0.000 | 0.002 |
| 0.003 | 0.006 | 0.000 | 0.020 | 0.005 | 0.001 | 0.002 | 0.004 | 0.001 | 0.001 | 0.000 | 0.001 | 0.001 | 0.001 | 0.003 |
| 0.000 | 0.005 | 0.004 | 0.005 | 0.030 | 0.005 | 0.005 | 0.004 | 0.002 | 0.002 | 0.001 | 0.002 | 0.000 | 0.000 | 0.003 |
| 0.001 | 0.004 | 0.002 | 0.001 | 0.005 | 0.023 | 0.001 | 0.003 | 0.003 | 0.002 | 0.002 | 0.002 | 0.001 | 0.000 | 0.008 |
| 0.000 | 0.000 | 0.001 | 0.002 | 0.005 | 0.001 | 0.014 | 0.005 | 0.003 | 0.002 | 0.000 | 0.002 | 0.001 | 0.001 | 0.003 |
| 0.001 | 0.002 | 0.000 | 0.004 | 0.004 | 0.003 | 0.005 | 0.016 | 0.005 | 0.002 | 0.000 | 0.001 | 0.001 | 0.000 | 0.002 |
| 0.001 | 0.001 | 0.002 | 0.001 | 0.002 | 0.003 | 0.003 | 0.005 | 0.027 | 0.003 | 0.000 | 0.001 | 0.002 | 0.001 | 0.001 |
| 0.000 | 0.000 | 0.001 | 0.001 | 0.002 | 0.002 | 0.002 | 0.002 | 0.003 | 0.019 | 0.000 | 0.002 | 0.002 | 0.000 | 0.002 |
| 0.002 | 0.001 | 0.001 | 0.000 | 0.001 | 0.002 | 0.000 | 0.000 | 0.000 | 0.000 | 0.029 | 0.006 | 0.005 | 0.000 | 0.001 |
| 0.000 | 0.002 | 0.001 | 0.001 | 0.002 | 0.002 | 0.002 | 0.001 | 0.001 | 0.002 | 0.006 | 0.029 | 0.005 | 0.000 | 0.002 |
| 0.001 | 0.002 | 0.002 | 0.001 | 0.000 | 0.001 | 0.001 | 0.001 | 0.002 | 0.002 | 0.005 | 0.005 | 0.049 | 0.001 | 0.002 |
| 0.000 | 0.001 | 0.000 | 0.001 | 0.000 | 0.000 | 0.001 | 0.000 | 0.001 | 0.000 | 0.000 | 0.000 | 0.001 | 0.024 | 0.012 |
| 0.000 | 0.001 | 0.002 | 0.003 | 0.003 | 0.008 | 0.003 | 0.002 | 0.001 | 0.002 | 0.001 | 0.002 | 0.002 | 0.012 | 0.099 |
