# Supplementary material
Source: ML conference proceedings conference paper supplement (https://proceedings.neurips.cc/paper_files/paper/2020/hash/3948ead63a9f2944218de038d8934305-Abstract.html)

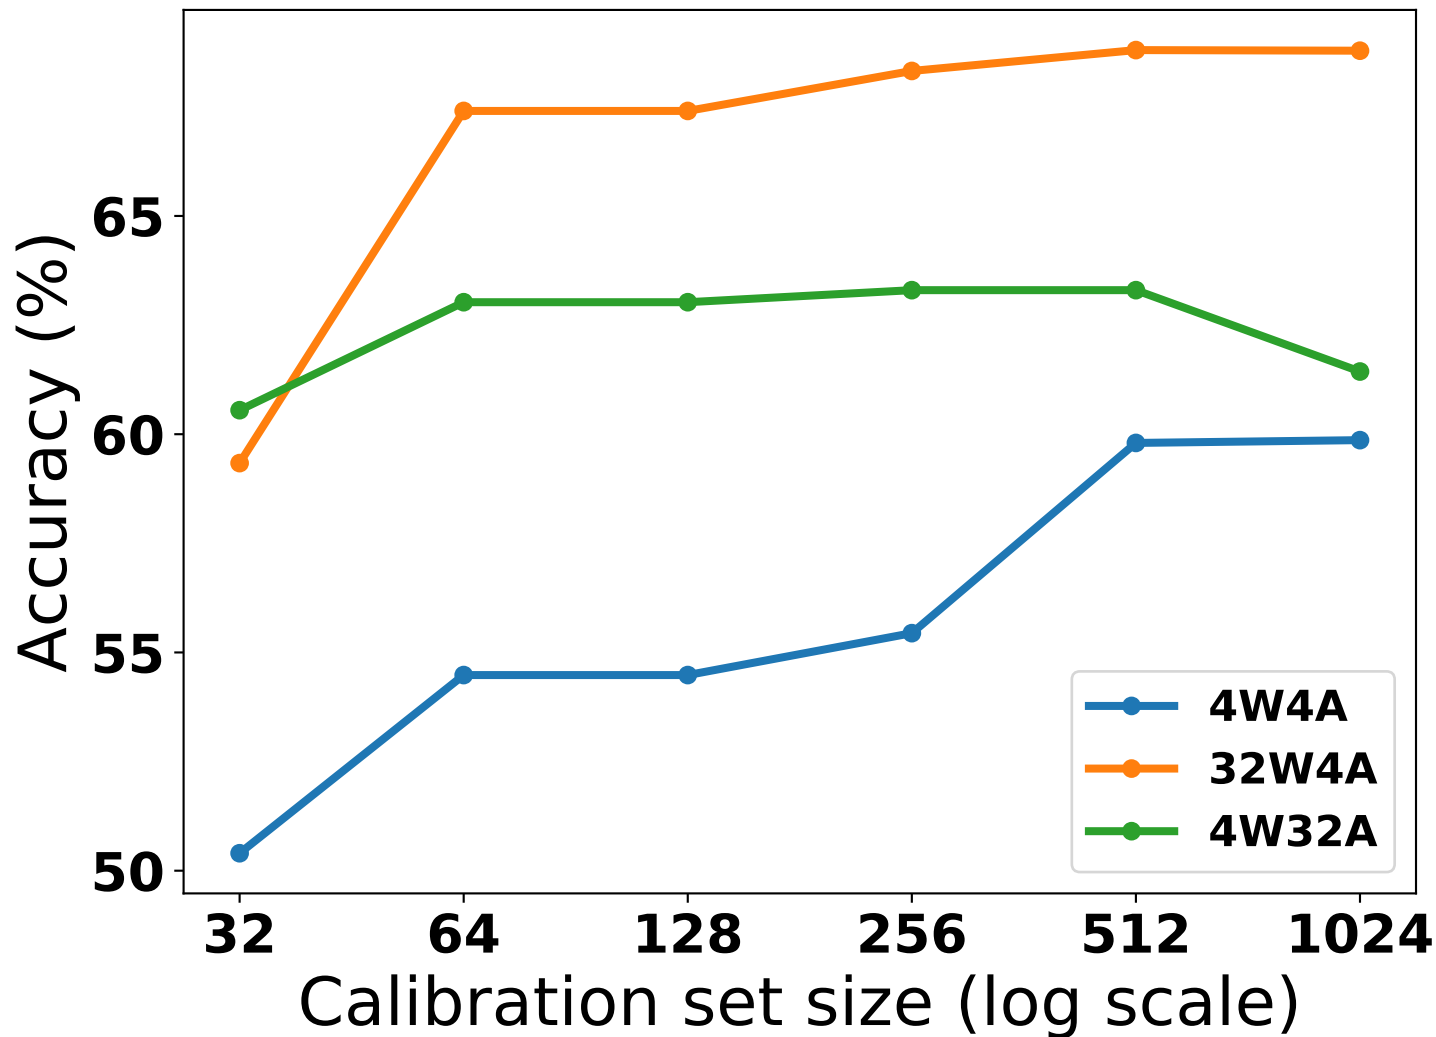

Supplement: Supplementary file [file 3948ead63a9f2944218de038d8934305-Supplemental.zip]
