# Supplementary material
Source: ML conference proceedings conference paper supplement (https://proceedings.neurips.cc/paper_files/paper/2020/hash/3948ead63a9f2944218de038d8934305-Abstract.html)
Supplement: Supplementary file [file 3948ead63a9f2944218de038d8934305-Supplemental.zip]

|      |      |      |      |      |      |      |      |      |      |      |      |      |      |      |
|------|------|------|------|------|------|------|------|------|------|------|------|------|------|------|
| 1.22 | 0.29 | 0.18 | 0.54 | 0.02 | 0.24 | 0.13 | 0.35 | 0.28 | 0.24 | 0.12 | 0.20 | 0.15 | 0.09 | 0.23 |
| 0.29 | 0.76 | 0.13 | 0.37 | 0.18 | 0.02 | 0.01 | 0.09 | 0.14 | 0.06 | 0.03 | 0.11 | 0.12 | 0.00 | 0.03 |
| 0.18 | 0.13 | 0.56 | 0.32 | 0.15 | 0.05 | 0.06 | 0.12 | 0.08 | 0.17 | 0.06 | 0.08 | 0.09 | 0.02 | 0.01 |
| 0.54 | 0.37 | 0.32 | 1.26 | 0.38 | 0.13 | 0.00 | 0.37 | 0.36 | 0.28 | 0.09 | 0.02 | 0.13 | 0.07 | 0.06 |
| 0.02 | 0.18 | 0.15 | 0.38 | 1.68 | 0.74 | 0.49 | 0.61 | 0.25 | 0.32 | 0.40 | 0.43 | 0.21 | 0.29 | 0.58 |
| 0.24 | 0.02 | 0.05 | 0.13 | 0.74 | 1.92 | 0.21 | 0.49 | 0.33 | 0.43 | 0.29 | 0.04 | 0.05 | 0.18 | 0.52 |
| 0.13 | 0.01 | 0.06 | 0.00 | 0.49 | 0.21 | 0.88 | 0.65 | 0.24 | 0.08 | 0.42 | 0.44 | 0.22 | 0.21 | 0.46 |
| 0.35 | 0.09 | 0.12 | 0.37 | 0.61 | 0.49 | 0.65 | 1.70 | 0.72 | 0.48 | 0.63 | 0.81 | 0.38 | 0.26 | 0.63 |
| 0.28 | 0.14 | 0.08 | 0.36 | 0.25 | 0.33 | 0.24 | 0.72 | 1.39 | 0.36 | 0.30 | 0.60 | 0.22 | 0.20 | 0.44 |
| 0.24 | 0.06 | 0.17 | 0.28 | 0.32 | 0.43 | 0.08 | 0.48 | 0.36 | 3.33 | 0.43 | 0.91 | 0.17 | 0.39 | 0.94 |
| 0.12 | 0.03 | 0.06 | 0.09 | 0.40 | 0.29 | 0.42 | 0.63 | 0.30 | 0.43 | 1.78 | 0.69 | 0.36 | 0.38 | 0.78 |
| 0.20 | 0.11 | 0.08 | 0.02 | 0.43 | 0.04 | 0.44 | 0.81 | 0.60 | 0.91 | 0.69 | 3.58 | 0.00 | 0.68 | 1.13 |
| 0.15 | 0.12 | 0.09 | 0.13 | 0.21 | 0.05 | 0.22 | 0.38 | 0.22 | 0.17 | 0.36 | 0.00 | 3.48 | 0.31 | 0.13 |
| 0.09 | 0.00 | 0.02 | 0.07 | 0.29 | 0.18 | 0.21 | 0.26 | 0.20 | 0.39 | 0.38 | 0.68 | 0.31 | 1.09 | 1.12 |
| 0.23 | 0.03 | 0.01 | 0.06 | 0.58 | 0.52 | 0.46 | 0.63 | 0.44 | 0.94 | 0.78 | 1.13 | 0.13 | 1.12 | 4.99 |
